# Supplementary material for: A supramolecular hydrogel for the delivery of bortezomib
Source: Royal Society of Chemistry journal article supplement (doi:10.1039/c4ra08011d), 2014-01-01
Supplement: c4ra08011d1.pdf [file c4ra08011d1.pdf]

## Supporting Information

1

2

### 3 **Materials and methods:**

4 **Chemicals:** Fmoc-amino acids were obtained from GL Biochem (Shanghai). HBTU and tris(2-  
5 carboxyethyl) phosphine Hydrochloride (TCEP) were purchased from Aladdin Chemistry CO. Ltd.  
6 Bortezomib (BTZ) were obtained from School of pharmaceutical and life sciences of Changzhou  
7 University. 3-(4, 5-Dimethylthiazol-2-yl)-2, 5-diphenyl tetrazolium bromide (MTT) was purchased from  
8 Invitrogen (Grand Island, NY). Commercially available reagents were used without further purification,  
9 unless noted otherwise. Nanopure water was used for all experiments. All other chemicals were reagent  
10 grade or better.

11

12 **General methods:** The synthesized compounds were characterized using <sup>1</sup>H NMR (Bruker ARX 400).  
13 ESI-MS and MALDI-TOF-MS spectrometric analyses were performed at the Thermo Finnigan LCQ AD  
14 System and AutoflexIII LRF200-CID System, respectively. HPLC was conducted at LUMTECH HPLC  
15 (Germany) system using a C<sub>18</sub> RP column with MeOH (0.1% of TFA) and water (0.1% of TFA) as the  
16 eluents. TEM images were done on a Tecnai G2 F20 system, operating at 200 kV. Rheology test was  
17 done on an AR 2000ex (TA instrument) system, 40 mm parallel plates was used during the experiment at  
18 the gap of 500µm. Bio-RAD iMark™ Microplate Reader (Bio-Rad, America) was used in the MTT  
19 assay.

20

### 21 **Syntheses and characterization**

22

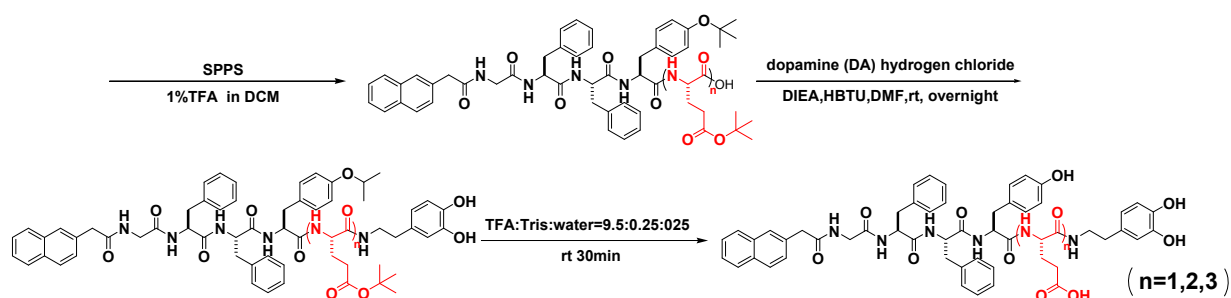

24 **Scheme S-1.** Synthesis of compounds *NapGFFYE<sub>n</sub>-Cat* (*n*=1, 2, 3)

25

26 **Peptide synthesis:** The peptide derivative was synthesized by solid phase peptide synthesis (SPPS)  
27 method using 2-chlorotrityl chloride resin and the corresponding N-Fmoc protected amino acids with side  
28 chains properly protected by different group. The first amino acid was loaded on the resin at the C-  
29 terminal with the loading efficiency about 1.2 mmol/g. 20% piperidine in anhydrous N, N'-  
30 dimethylformamide (DMF) was used during the deprotection of Fmoc group. Then the next Fmoc-

31 protected amino acid was coupled to the free amino group using O-(Benzotriazol-1-yl)-N,N,N',N'-  
32 tetramethyluroniumhexafluorophosphate (HBTU) as the coupling reagent. The growth of the peptide  
33 chain was according to the established Fmoc SPPS protocol. At the final step, 2-naphthylacetic acid was  
34 used to attach on the peptide. After the last coupling step, excessive reagents were removed by a single  
35 DMF wash for 5 minutes (5 mL per gram of resin), followed by five steps of washing using  
36 dichloromethane (DCM) for 2 min (5 mL per gram of resin). The peptide derivatives were cleaved using  
37 1%TFA in DCM for 10 times (1 min/time, 5 mL per gram of resin). The solution was stirred at room  
38 temperature for 30min and the solvent was evaporated under vacuum. 20mL per gram of resin of ice-cold  
39 diethylether was then added to cleavage reagent. The resulting precipitate was filtrated and washed by  
40 ice-cold diethylether. Then the supernatant was decanted and the resulting solid was directly used in the  
41 next synthesis steps without further purification.

42

43 **Synthesis of peptide-Cat:** The mixture of peptide (1 mmol), HBTU (1mmol), DIEA (2 mmol) and  
44 dopamine (Cat) hydrogen chloride (1.2 mmol) in 1ml DMF was stirred at room temperature overnight.  
45 Then 95% of trifluoroacetic acid with 2.5% of TMS and 2.5% of H<sub>2</sub>O was added to the mixture and  
46 stirred at room temperature for 30 minutes. The solution evaporated under vacuum about 2ml and 20ml  
47 ether was added. The filtrate was added to ice water and the precipitate was obtained by a further filter.  
48 The crude product was purified by HPLC. After lyophilization of purified Nap-GFFY(E)<sub>n</sub>-Cat, residual  
49 trifluoroacetic acid counterion were exchanged by sublimation from HCl (10mM) in order to improve  
50 biocompatibility. Nap-GFFY(E)<sub>n</sub>-Cat were then resolubilized in deionized water, lyophilized, and stored  
51 at -20°C until used.

52

### 53 **Formation of nanospheres and hydrogels:**

54 *Hydrogel of Nap-GFFY(E)<sub>n</sub>-Cat:* 1.25mg of Nap-GFFY(E)<sub>n</sub>-Cat and n equiv. of Na<sub>2</sub>CO<sub>3</sub> were firstly  
55 suspended in 0.25 mL phosphate buffer saline (PBS, pH = 7.4, n=1,2,3), and then the suspensions were  
56 heated to form clear solutions. The resulting clear solution was cooled down to room temperature to form  
57 the hydrogel or not.

58 *Hydrogel of Nap-GFFY(E)<sub>n</sub>-Cat-BTZ:* 1.25 mg of Nap-GFFY(E)<sub>n</sub>-Cat and n equiv. of Na<sub>2</sub>CO<sub>3</sub> were  
59 firstly suspended in 0.25ml phosphate buffer saline (PBS, pH = 7.4 ,n=2,3), and then the suspensions  
60 were heated to form clear solutions. After this step, 1 equiv. of bortezomib was added to the solution and  
61 ultrasonic to promote the conjunction of peptide and bortezomib.

62 However, when n=1 and 3, there were no hydrogels formed in PBS buffer solution as shown in Fig.S-1.

63

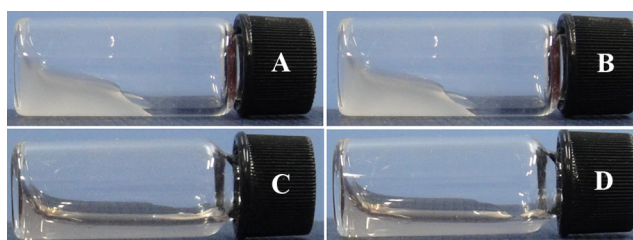

64

65 **Fig.S-1.** Optical images of (A) the suspension formed from 0.5% *Nap-GFFYE-Cat* in PBS solution (B) the suspension  
 66 formed from 0.5% *Nap-GFFYE-Cat* with 1 equiv. of *BTZ* in PBS solution (C) the clear solution formed from 0.5%  
 67 *Nap-GFFYEEE-Cat* in PBS solution (D) the clear solution formed from 0.5% *Nap-GFFYEEE-Cat* with 1 equiv. of  
 68 *BTZ* in PBS solution.

69

70 **Compound Nap-GFFYE-Cat:**  $^1\text{H NMR}$  (400 MHz,  $d_6$ -DMSO)  $\delta$  9.16 (s, 1H), 8.70 (s, 1H), 8.62 (s, 1H),  
 71 8.22 (s, 1H), 8.12 (dd,  $J = 16.5, 5.3$  Hz, 3H), 8.00 (s, 2H), 7.88 – 7.79 (m, 3H), 7.74 (s, 1H), 7.67 (s, 1H),  
 72 7.52 – 7.36 (m, 4H), 7.17 (d,  $J = 17.4$  Hz, 9H), 7.04 (d,  $J = 8.4$  Hz, 2H), 6.62 (dd,  $J = 22.1, 9.5$  Hz, 4H),  
 73 6.42 (d,  $J = 10.7$  Hz, 2H), 4.49 (t,  $J = 12.7$  Hz, 4H), 4.25 – 4.16 (m, 2H), 3.72 – 3.55 (m, 6H), 3.21 – 3.10  
 74 (m, 3H), 2.94 (dd,  $J = 30.6, 12.1$  Hz, 4H), 2.76 (dd,  $J = 17.9, 4.2$  Hz, 3H), 2.23 – 2.16 (m, 2H). HR-MS:  
 75 calc.  $M = 964.40$ , obsvd.  $(M+H)^+ = 965.4096$ .

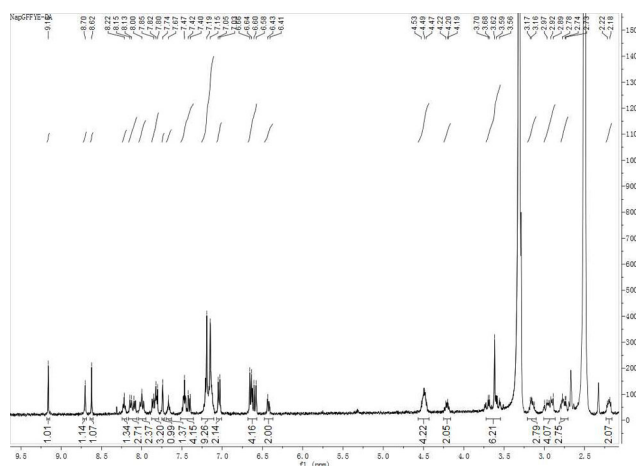

76

77

78

**Fig. S-2.**  $^1\text{H NMR}$  of Compound *NapGFFYE-Cat*

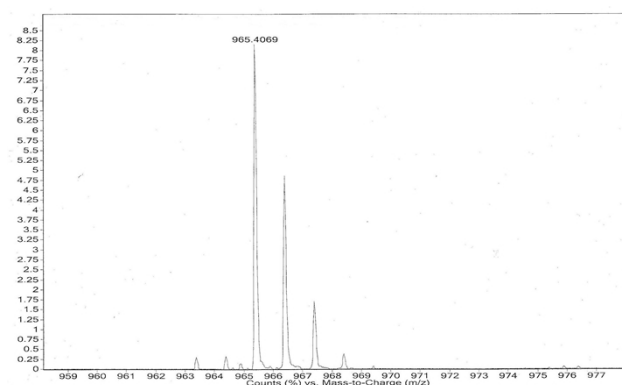

79

80

81

**Fig. S-3.** HR-MS of Compound *NapGFFYE-Cat*

82 **Compound Nap-GFFYEE-Cat:**  $^1\text{H}$  NMR (400 MHz,  $\text{D}_2\text{O}$ ):  $\delta$  7.87 – 7.72 (m, 5H), 7.45 (d,  $J = 13.1$  Hz,  
 83 3H), 7.36 (d,  $J = 8.7$  Hz, 2H), 7.17 (d,  $J = 12.1$  Hz, 8H), 6.99 (s, 5H), 6.91 (s, 3H), 6.79 – 6.63 (m, 5H),  
 84 6.58 (d,  $J = 8.1$  Hz, 1H), 4.39 (s, 4H), 4.21 – 3.98 (m, 5H), 3.76 (d,  $J = 16.8$  Hz, 6H), 3.57 (s, 1H), 3.37 –  
 85 3.28 (m, 2H), 2.93 – 2.82 (m, 3H), 2.74 (d,  $J = 9.5$  Hz, 4H), 2.61 (dd,  $J = 13.1, 7.0$  Hz, 4H). HR-MS: calc.  
 86  $M = 1094.4503$ , obsvd.  $(\text{M}+\text{H})^+ = 1095.4530$ .

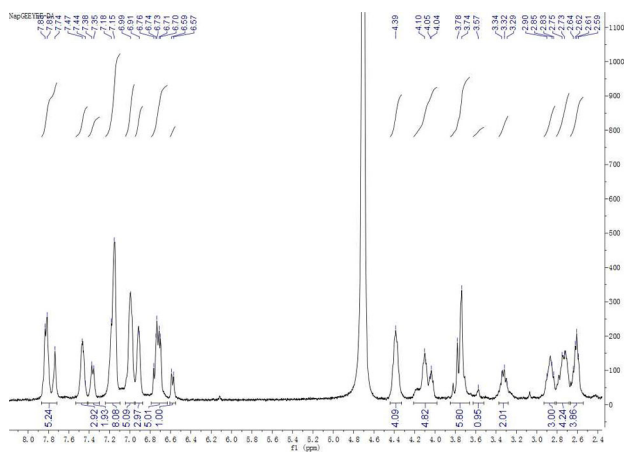

87  
 88 **Fig. S-4.**  $^1\text{H}$  NMR of Compound *NapGFFYEE-Cat*  
 89

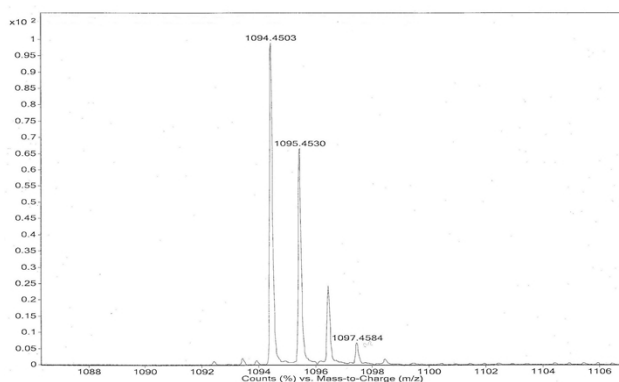

90  
 91 **Fig. S-5.** HR-MS of Compound *NapGFFYEE-Cat*  
 92

93 **Compound Nap-GFFYEEE-Cat:**  $^1\text{H}$  NMR (400 MHz,  $\text{d}^6\text{-DMSO}$ ):  $\delta$  9.16 (s, 1H), 8.75 (s, 1H), 8.66 (s,  
 94 1H), 8.27 – 8.17 (m, 2H), 8.13 (d,  $J = 7.4$  Hz, 2H), 8.08 – 7.98 (m, 3H), 7.95 (d,  $J = 4.5$  Hz, 1H), 7.89 –  
 95 7.84 (m, 1H), 7.84 – 7.79 (m, 2H), 7.74 (s, 1H), 7.51 – 7.45 (m, 2H), 7.41 (dd,  $J = 8.4, 1.5$  Hz, 1H), 7.23  
 96 – 7.17 (m, 4H), 7.15 – 7.08 (m, 6H), 7.05 (d,  $J = 8.4$  Hz, 2H), 6.63 (dd,  $J = 11.6, 8.2$  Hz, 3H), 6.57 (d,  $J =$   
 97 1.9 Hz, 1H), 6.42 (dd,  $J = 8.0, 1.8$  Hz, 1H), 4.53 – 4.45 (m, 3H), 4.33 – 4.23 (m, 2H), 4.17 (dd,  $J = 13.6,$   
 98 7.9 Hz, 1H), 3.70 (dd,  $J = 16.8, 5.6$  Hz, 1H), 3.64 – 3.52 (m, 4H), 3.25 – 3.07 (m, 3H), 3.02 – 2.86 (m,  
 99 4H), 2.79 – 2.61 (m, 4H), 2.34 – 2.16 (m, 7H), 1.95 – 1.84 (m, 3H), 1.81 – 1.70 (m, 3H). HR-MS: calc.  $M$   
 100  $= 1223.4921$ , obsvd.  $(\text{M}+\text{H})^+ = 1224.4995$ .

101

102

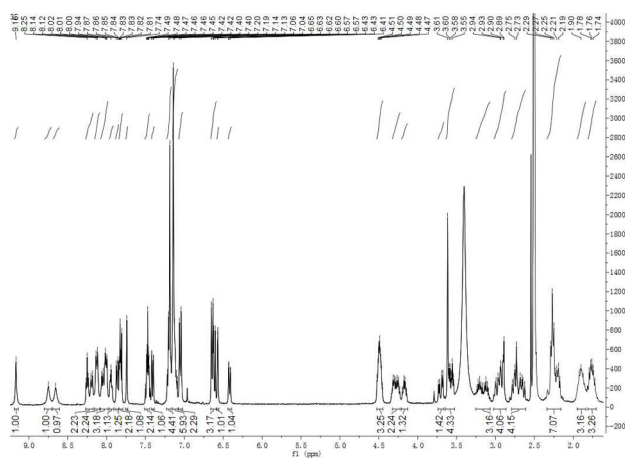

**Fig. S-6.**  $^1\text{H}$  NMR of Compound *Nap-GFFYEE-Cat*

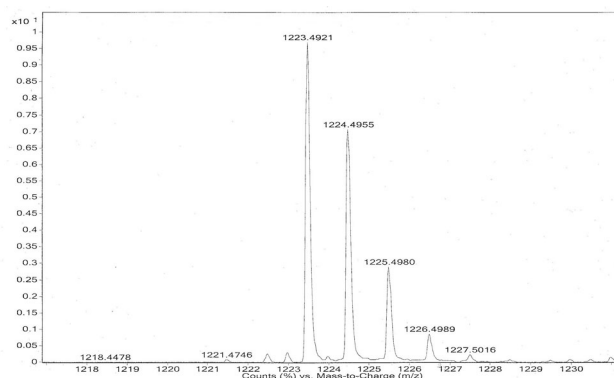

**Fig. S-7.** HR-MS of Compound *Nap-GFFYEE-Cat*

103  
104  
105

106  
107  
108  
109

110  **$^1\text{H}$  NMR analysis of interaction of bortezomib and Nap-GFFYEE-Cat conjugates:** Bortezomib (BTZ)  
 111 was dissolved in  $d^6$ -DMSO at 2M concentration. Nap-GFFYEE-Cat was dissolved in  $\text{D}_2\text{O}$  at 0.2M, and  
 112 pH of such solution of was adjusted with 0.1M  $\text{Na}_2\text{CO}_3$  in  $\text{D}_2\text{O}$  to 7.4. Then BTZ and Nap-GFFYEE-Cat  
 113 were mixed to give a stock solution of Nap-GFFYEE-Cat-BTZ conjugate at 0.1 M in  $\text{D}_2\text{O}$ .  $\text{D}_2\text{O}$  was used  
 114 to dilute the Nap-GFFYEE-Cat-BTZ stock to 1 mM, and 0.2M of Nap-GFFYEE-Cat was diluted to 1mM  
 115 by  $\text{D}_2\text{O}$ . These solutions were analyzed an hour after preparation on  $^1\text{H}$  NMR (Bruker ARX 400) and  
 116 peak integrals in the range of 7.2 to 5.5 ppm and range from 8.3 to 9.0 ppm were used for quantifying the  
 117 degree of dissociation of Cat-BTZ presented in Fig.S-8.

118

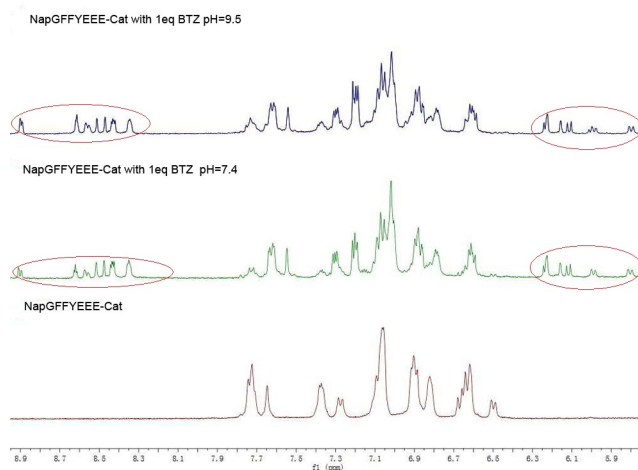

119

120

**Fig. S-8.**  $^1\text{H}$  NMR spectrum of *Nap-GFFYEE-Cat* and *Nap-GFFYEE-Cat* with *BTZ* mixture.

121

122 **Rheology:** Rheology test was done on an AR 1500ex (TA instrument) system, 25 mm parallel plates was  
 123 used during the experiments at the gap of 400 $\mu\text{m}$ . The dynamic time sweep was conducted at the  
 124 frequency of 1 rad/s and the strain of 1%. Dynamic strain sweep was performed and the strain values  
 125 within the linear range were chosen for the following dynamic frequency sweep. The gels were also  
 126 characterized by the mode of dynamic frequency sweep in the region of 0.1-100rad/s at the strain of 1%.

127

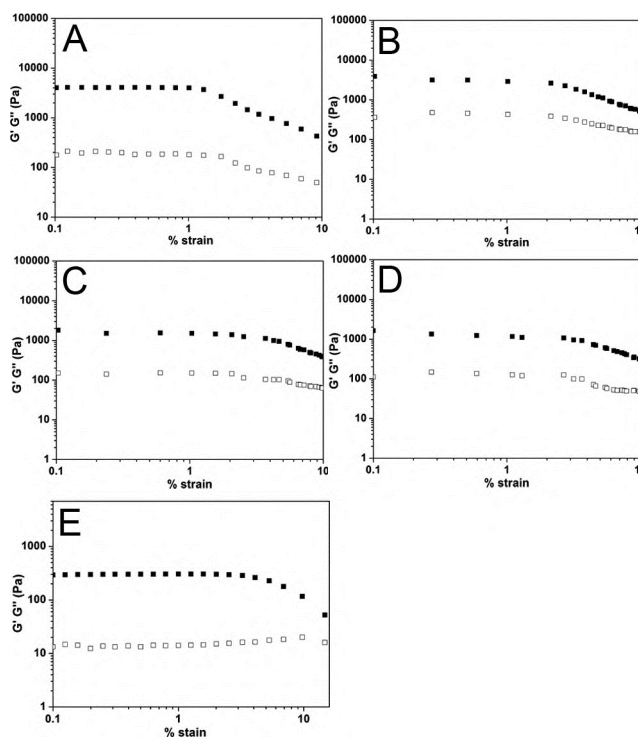

128

129 **Fig.S-9.** Dynamic strain sweep of the gels formed by PBS solution of *Nap-GFFYEEE-Cat* (0.5 wt%) A) without *BTZ*,  
 130 B) with 0.125 equiv. of *BTZ*, C) with 0.25 equiv. of *BTZ*, D) with 0.5 equiv. of *BTZ*, and E) with 1 equiv. of *BTZ* at  
 131 the frequency of 1rad/s (the solid symbols represent elasticity ( $G'$ ) and the hollow ones represent viscosity ( $G''$ )).

132

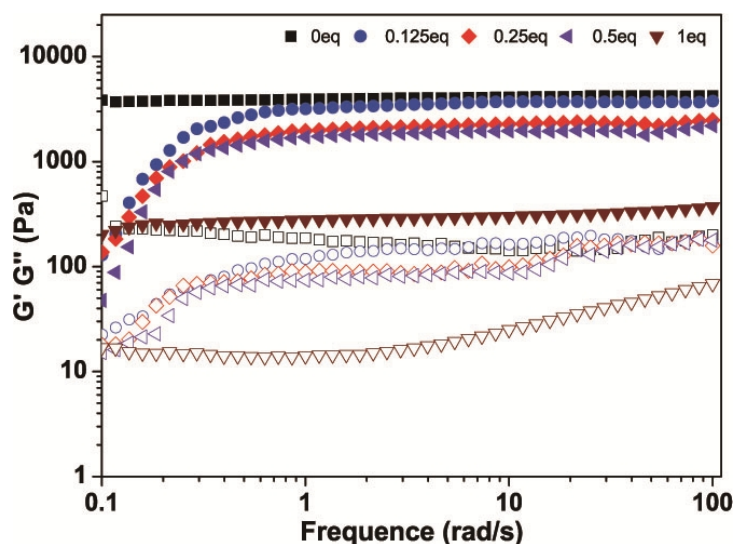

133

134 **Fig. S-10.** Dynamic frequency sweep of the gel formed by PBS solution of Nap-GFFYEE-Cat (0.5 wt%) without

135 BTZ (■), with 0.125 equiv. of BTZ (●), 0.25 equiv. of BTZ (◆), 0.5 equiv. of BTZ (▼), and 1 equiv. of BTZ (▼).

136

137 **In vitro release of BTZ from peptide derivatives:** A hydrogel in PBS (pH =7.4) solution containing

138 0.5wt% of Nap-GFFYEE-Cat and contain 1, 0.5, 0.25 and 0.125 equiv. of bortezomib, then was formed

139 in an eppendorf tube at 25°C. After 24 h, we added 0.25 mL of PBS on the surface of the hydrogels, 0.2

140 mL solution was taken out at the desired time point and 0.2mL PBS was added back. For the following

141 time points, 0.2 mL of PBS was taken out and 0.2 mL of PBS was added back at each point. We then

142 monitored and calculated the release profile from the gel formed by a LCMS-2020 (Shimadzu) system.

143 The experiment was performed at 37 °C.

144

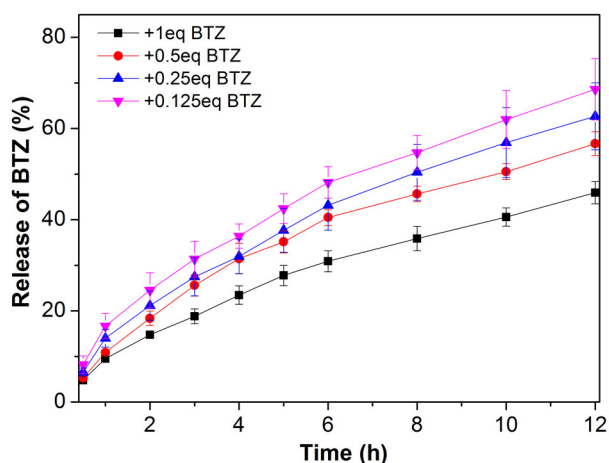

145

146 **Fig. S-11.** The release of BTZ from hydrogels to PBS buffer solution at 37°C.

147

148 **Preparation of TEM samples of compounds:**

149 Solutions of Nap-GFFYEE-Cat and Nap-GFFYEE-Cat with 1equiv. of bortezomib were prepared as

150 described above. Next, 10 μL samples of each were placed on a carbon-coated copper grid and incubated

151 for 30 seconds to allow the peptide nanostructures to adhere to the substrate, then rinsed twice with  
152 ultrapure water. The samples were then stained with a saturated uranyl acetate solution and placed in a  
153 desiccator overnight prior to analysis.

154

#### 155 **Preparation of SEM samples of compounds:**

156 First, the hydrogels of Nap-GFFYEE-Cat and Nap-GFFYEE-Cat with 1 equiv. of bortezomib were  
157 prepared as described above. Second, they were freeze-dried by a lyophilizer. Third, the freeze-dried  
158 powders were adhered to a copper plate. Then the copper plate was sprayed by metal gold prior to  
159 analysis.

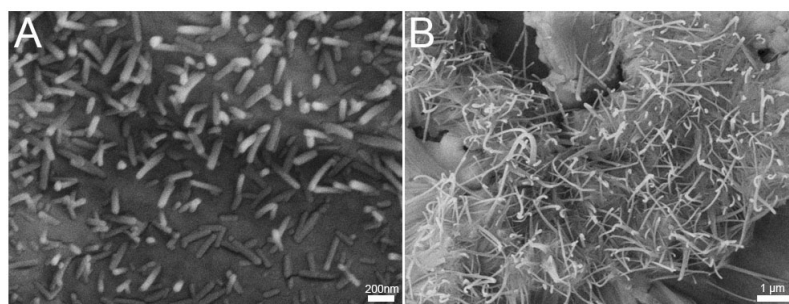

160

161 **Fig. S-12.** The SEM images of hydrogels formed by A) Nap-GFFYEE-Cat (0.5 wt%) with 1 equiv. of BTZ, B) Nap-  
162 GFFYEE-Cat (0.5 wt%).

163

#### 164 **Preparation of peptide-bortezomib conjugates for cytotoxicity assays:**

165 For all the experiments where peptide-bortezomib conjugates were tested, the following sample  
166 preparation method was used. Peptide-bortezomib and pure BTZ solutions (100 mL) in DMEM at a final  
167 equivalent BTZ concentration of 1mg/L were prepared, and then they were diluted to use for the cell  
168 culture (the coefficient of dilution =0.5).

169

170 **Determination of IC<sub>50</sub> values on different cells:** Three cells of 3T3, HepG2, and HeLa were seeded in a  
171 96-well plate with the density of 10,000 cells per-well (total medium volume of 100 μL). 24 hours post  
172 seeding, the solutions with a serial of concentrations (8 concentrations) of the compound in 100μL of  
173 medium were added to each well (five wells for each concentration). Cells without the treatment of the  
174 compound were used as the control. The MTT assays were performed after an extra culture time of 48  
175 hours. All compounds were removed and 90 μL fresh medium was added for each well, 10 μL of MTT  
176 solution (5 mg/mL) was added and incubated for 4 hours in 37°C. Pipette out the spent media, formazon  
177 crystals at the bottom of each well were dissolved in 100 μL of DMSO. After 15 minutes at room  
178 temperature, absorbance at wavelength of 490 nm was tested using a microplate reader (BIO-RAD, iMark  
179 TM). IC<sub>50</sub> values for the inhibition of cell viability were calculated from pharmacological inhibitory



180 response curves using software Prism 5.0. The cell viability percent was calculated by the following  
181 formula:

182 
$$\text{The cell viability percent (\%)} = \text{OD}_{\text{sample}}/\text{OD}_{\text{control}} * 100\%$$

183

184 The concentrations of the compounds when 50% of cell viability was recorded represented the IC<sub>50</sub> values  
185 of the compounds. All experiments were conducted in triplicate.

186

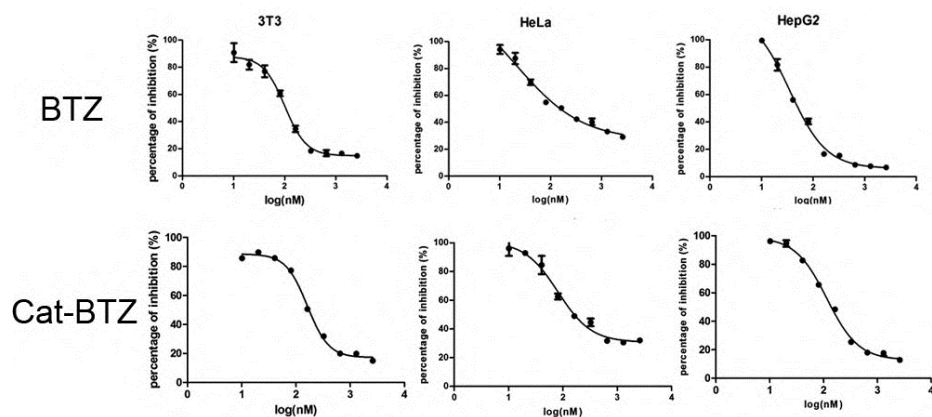

187

188 **Fig.S-13.** Congress curve of cell inhibition assay of different cells treated with different concentrations  
189 of BTZ and Nap-GFFYEE-Cat with 1equiv. of BTZ (n=3).

190

191

192

193

194

195

196

197

198

199

200

201

202
